# Supplementary material
Source: Research Square preprint supplement (doi:10.21203/rs.3.rs-9022823/v1)
Supplement: Supplementary file 1 [file 648df96e563a788d10d702f2.docx]

**Supplementary Data**

**Table 1**
*Trait Data Before Outlier Removal*

|  | Plot_Area_ha | Stand_Count_plants | Pollen_DAP_days | Silk_DAP_days | Plant_Height_cm | Ear_Height_cm | Root_Lodging_plants | Stalk_Lodging_plants | Yield_Mg_ha | Grain_Moisture | Twt_kg_m3 |
| --- | --- | --- | --- | --- | --- | --- | --- | --- | --- | --- | --- |
| count | 45800 | 45800 | 45800 | 45800 | 45800 | 45800 | 45800 | 45800 | 45800 | 45800 | 45800 |
| mean | 0.0008 | 63.37 | 66.527 | 68.04 | 236.75 | 113.9 | 2.682 | 4.029 | 10.39 | 19.41 | 724.544 |
| std | 0.0001 | 10.603 | 6.29 | 6.491 | 31.532 | 23.41 | 9.347 | 9.196 | 2.888 | 5.751 | 46.965 |
| min | 0.0004 | 4 | 47 | 47 | 120 | 35 | 0 | 0 | 0.521 | 7.26 | 601.116 |
| 25% | 0.0006 | 57 | 62 | 64 | 217 | 99 | 0 | 0 | 8.551 | 15.1 | 691.218 |
| 50% | 0.0008 | 63 | 66 | 68 | 240 | 115 | 0 | 0 | 10.487 | 19.1 | 723.398 |
| 75% | 0.0009 | 70 | 70 | 72 | 258.33 | 130 | 1 | 3 | 12.386 | 22.4 | 756.865 |
| max | 0.0016 | 98 | 100 | 100 | 350 | 200 | 84 | 87 | 18.804 | 44.8 | 898.236 |

**Table 2**

*Trait Data Outlier Removed*

|  | Plot_Area_ha | Stand_Count_plants | Pollen_DAP_days | Silk_DAP_days | Plant_Height_cm | Ear_Height_cm | Root_Lodging_plants | Stalk_Lodging_plants | Yield_Mg_ha | Grain_Moisture | Twt_kg_m3 |
| --- | --- | --- | --- | --- | --- | --- | --- | --- | --- | --- | --- |
| count | 41343 | 41343 | 41343 | 41343 | 41343 | 41343 | 41343 | 41343 | 41343 | 41343 | 41343 |
| mean | 0.0008 | 63.22 | 66.618 | 68.11 | 235.67 | 113.1 | 1.417 | 2.812 | 10.63 | 19.16 | 725.702 |
| std | 0.0001 | 10.151 | 6.232 | 6.414 | 31.131 | 23.12 | 4.014 | 5.225 | 2.76 | 5.269 | 45.399 |
| min | 0.0005 | 32 | 48 | 49 | 142.24 | 45 | 0 | 0 | 1.727 | 7.26 | 601.116 |
| 25% | 0.0006 | 56 | 62 | 64 | 216 | 98 | 0 | 0 | 8.881 | 15.19 | 693.793 |
| 50% | 0.0008 | 63 | 66 | 68 | 238.33 | 114 | 0 | 0 | 10.67 | 19.08 | 724.806 |
| 75% | 0.0009 | 70 | 71 | 72 | 257 | 130 | 0 | 3 | 12.50 | 22.2 | 756.865 |
| max | 0.0011 | 94 | 85 | 87 | 330.5 | 184 | 30 | 31 | 18.80 | 36.64 | 865.323 |

**Table 3**

*Handling Metadata Field coordinates*

| Environment | Experiment code | Environment used for replacement |
| --- | --- | --- |
| NEH2_2019 | NEH2 | NEH2_2021, NEH2_2022 |
| NEH2_2020 | NEH2 | NEH2_2021, NEH2_2022 |
| TXH4_2019 | TXH4 | Removed as the Environment is not present in the processed trait dataset, which would be used for merging |
| NEH3_2020 | NEH3 | NEH3_2021, NEH3_2022 |
| ILH1_2021 | ILH1 | ILH1_2019, ILH1_2022, ILH1_2023 |
| NYS1_2021 | NYS1 | NYS1_2020 |

**Table 4**

*Leave One Year Out Train test size:*

| Test year | Train size | Test size | Test hybrids | Overlapping hybrids |
| --- | --- | --- | --- | --- |
| 2019 | 20841 | 9024 | 1155 | 24 |
| 2020 | 25205 | 4660 | 1171 | 1165 |
| 2021 | 25476 | 4389 | 1174 | 1164 |
| 2022 | 24118 | 5747 | 541 | 536 |
| 2023 | 23820 | 6045 | 542 | 535 |

**Table 5**

*Rolling Year Train test size:*

| Train_Years | Test_Year | Train_Size | Test_Size | Overlapping_Hybrids |
| --- | --- | --- | --- | --- |
| 2019 | 2020 | 9024 | 4660 | 24 |
| 2019, 2020 | 2021 | 13684 | 4389 | 1164 |
| 2019, 2020, 2021 | 2022 | 18073 | 5747 | 44 |
| 2019, 2020, 2021, 2022 | 2023 | 23820 | 6045 | 535 |
